# Supplementary material for: Eco-evolutionary feedbacks in the human gut microbiome
Source: PubMed Central journal article supplement (PMC10628149; doi:10.1038/s41467-023-42769-3), 2023-11-06
Supplement: 41467_2023_42769_MOESM3_ESM.pdf [file 41467_2023_42769_MOESM3_ESM.pdf]

## **Supplementary Data Files**

**Supplementary Data 1.** List of metagenomic samples and metadata used in this study.

**Supplementary Data 2.** Results of sweep-detection pipeline applied to all non-redundant pairs of quasi-phaseable timepoints.

**Supplementary Data 3.** Locations of SNVs for all detected sweeps in Supplementary Data 2.

**Supplementary Data 4.** Species relative abundance estimates for each of the samples in Supplementary Data 1.

**Supplementary Code 1.** Analysis code and figure generation scripts for Figures 1-3.
